# Supplementary material
Source: PubMed Central journal article supplement (PMC10241712)

**Incidence of mental disorders in the general population aged 1 to 30 years disaggregated by gender and socioeconomic status. Supplementary material.**

Table SM 1 - ICD codes used for each category of mental disorder.

|                                                        | <b>ICD-9</b>                                   | <b>ICD-10</b>                  |
|--------------------------------------------------------|------------------------------------------------|--------------------------------|
| <b>Attention deficit hyperactivity disorder (ADHD)</b> | 314.xx                                         | F90.xx                         |
| <b>Conduct disorders</b>                               | 312.0x-312.2x, 312.4x-312.9x, 313.xx           | F91.xx-F99.xx                  |
| <b>Anxiety</b>                                         | 300.xx, 308.xx-309.xx                          | F40.xx-F49.xx                  |
| <b>Depression</b>                                      | 296.xx-299.xx, 300.4, 311                      | F30.xx-F39.xx                  |
| <b>Substance abuse</b>                                 | 303.xx-305.xx                                  | F10.xx-F19.xx                  |
| <b>Psychosis and personality disorders</b>             | 291.xx-292.xx, 295.xx<br>301.xx-302.xx, 312.3x | F20.xx-F29.xx<br>F60.xx-F69.xx |
| <b>Eating disorders</b>                                | 307.1x, 307.5x                                 | F50.xx                         |
| <b>Self-harm</b>                                       | V62.84, E95x.xx                                | R45.851, T14.91, X71.xx-X83.xx |

Table SM 2 - Characteristics of the Basque population aged between 1 and 30 years at December 31, 2018.

|                      |        | Study population |       | Mental disorder diagnosed |       |        |       | p-value <sup>a</sup> |
|----------------------|--------|------------------|-------|---------------------------|-------|--------|-------|----------------------|
|                      |        | N                | %     | No                        |       | Yes    |       |                      |
|                      |        | N                | %     | N                         | %     | N      | %     |                      |
| Patients             | Total  | 609,381          |       | 513,321                   | 84.2% | 96,060 | 15.8% |                      |
|                      | Mean   | 15.57            |       | 14.70                     |       | 20.23  |       | 0.000                |
| Age                  | 0-12   | 246,275          | 40.4% | 231,131                   | 93.9% | 15,144 | 6.1%  | 0.000                |
|                      | 13-18  | 123,109          | 20.2% | 100,726                   | 81.8% | 22,383 | 18.2% |                      |
|                      | 19-24  | 114,710          | 18.8% | 88,093                    | 76.8% | 26,617 | 23.2% |                      |
|                      | 25-30  | 125,287          | 20.6% | 93,371                    | 74.5% | 31,916 | 25.5% |                      |
| Gender               | Female | 296,556          | 48.7% | 252,151                   | 85.0% | 44,405 | 15.0% | 0.000                |
|                      | Male   | 312,825          | 51.3% | 261,170                   | 83.5% | 51,655 | 16.5% |                      |
| Socioeconomic status | Low    | 22,285           | 3.7%  | 17,681                    | 79.3% | 4,604  | 20.7% | 0.000                |
|                      | Medium | 329,993          | 54.2% | 268,219                   | 81.3% | 61,774 | 18.7% |                      |
|                      | High   | 257,103          | 42.2% | 227,421                   | 88.5% | 29,682 | 11.5% |                      |

<sup>a</sup> Chi square test was used for categorical variables and Student's t test for continuous variables.

Table SM3 - Distribution of prevalence of mental disorders by copayment categories in the Basque population 1-30 years.

| <b>Socioeconomic status</b> | <b>Code</b>     | <b>Income</b> | <b>N</b>       | <b>%</b>      | <b>Mental disorders (n)</b> | <b>Mental disorders (%)</b> |
|-----------------------------|-----------------|---------------|----------------|---------------|-----------------------------|-----------------------------|
| Low                         | TSI 001         | no income     | 22,285         | 3.7%          | 4,655                       | 20.9%                       |
| Medium                      | TSI 002 retired | <18000        | 17,858         | 2.9%          | 4,322                       | 24.2%                       |
|                             | TSI 003 worker  | <18000        | 312,135        | 51.2%         | 57,829                      | 18.5%                       |
| High                        | TSI 002 retired | >18000        | 7,273          | 1.2%          | 1,494                       | 20.5%                       |
|                             | TSI 004 worker  | >18000        | 240,996        | 39.5%         | 27,606                      | 11.5%                       |
|                             | TSI 005 worker  | >100000       | 6,952          | 1.1%          | 535                         | 7.7%                        |
|                             | TSI 006 worker  | muface        | 1,882          | 0.3%          | 230                         | 12.2%                       |
| <b>Total</b>                |                 |               | <b>609,381</b> | <b>100.0%</b> | <b>96,671</b>               | <b>15.9%</b>                |

Table SM 4 - Total incidence rates (cases/1000 person-years) by type of mental disorder per year.

| Age | Any disorder | ADHD | Conduct disorders | Anxiety | Depression | Substance use disorders | Psychosis and personality disorders | Eating disorders | Self-harm |
|-----|--------------|------|-------------------|---------|------------|-------------------------|-------------------------------------|------------------|-----------|
| 1   | 0.53         | 0.03 | 0.34              | 0.01    | 0.05       | 0.00                    | 0.04                                | 0.05             | 0.00      |
| 2   | 2.41         | 0.11 | 1.05              | 0.26    | 0.32       | 0.00                    | 0.11                                | 0.59             | 0.01      |
| 3   | 3.75         | 0.19 | 2.09              | 0.36    | 0.61       | 0.00                    | 0.19                                | 0.47             | 0.00      |
| 4   | 4.45         | 0.44 | 2.76              | 0.41    | 0.47       | 0.00                    | 0.17                                | 0.38             | 0.01      |
| 5   | 5.27         | 0.74 | 3.26              | 0.60    | 0.42       | 0.00                    | 0.19                                | 0.32             | 0.01      |
| 6   | 5.94         | 1.49 | 3.32              | 0.74    | 0.30       | 0.00                    | 0.16                                | 0.28             | 0.01      |
| 7   | 9.57         | 3.69 | 4.51              | 1.21    | 0.38       | 0.00                    | 0.18                                | 0.27             | 0.00      |
| 8   | 9.85         | 4.21 | 4.34              | 1.46    | 0.26       | 0.00                    | 0.20                                | 0.23             | 0.01      |
| 9   | 11.09        | 4.70 | 4.82              | 1.90    | 0.33       | 0.02                    | 0.18                                | 0.25             | 0.00      |
| 10  | 10.48        | 4.10 | 4.40              | 2.55    | 0.30       | 0.01                    | 0.22                                | 0.23             | 0.00      |
| 11  | 10.34        | 3.50 | 4.42              | 2.99    | 0.32       | 0.03                    | 0.22                                | 0.23             | 0.00      |
| 12  | 8.86         | 2.80 | 3.67              | 2.90    | 0.32       | 0.05                    | 0.22                                | 0.29             | 0.03      |
| 13  | 9.71         | 3.00 | 4.11              | 3.40    | 0.34       | 0.15                    | 0.29                                | 0.42             | 0.05      |
| 14  | 11.29        | 3.50 | 4.42              | 3.60    | 0.49       | 0.66                    | 0.48                                | 0.77             | 0.14      |
| 15  | 11.04        | 2.40 | 2.69              | 4.80    | 0.68       | 2.06                    | 0.54                                | 1.02             | 0.13      |
| 16  | 11.70        | 1.60 | 2.23              | 6.10    | 0.79       | 3.38                    | 0.78                                | 1.18             | 0.18      |
| 17  | 13.63        | 1.20 | 1.93              | 7.80    | 1.04       | 4.54                    | 0.93                                | 1.31             | 0.18      |
| 18  | 15.08        | 1.00 | 1.73              | 9.60    | 1.27       | 5.70                    | 1.10                                | 1.02             | 0.23      |
| 19  | 15.47        | 0.70 | 1.20              | 10.30   | 1.25       | 6.50                    | 1.13                                | 0.79             | 0.15      |
| 20  | 15.98        | 0.40 | 1.09              | 11.00   | 1.36       | 7.30                    | 1.12                                | 0.70             | 0.19      |
| 21  | 17.21        | 0.30 | 0.99              | 12.20   | 1.50       | 7.70                    | 1.27                                | 0.60             | 0.14      |
| 22  | 17.71        | 0.30 | 0.76              | 12.80   | 1.70       | 8.30                    | 1.09                                | 0.70             | 0.22      |
| 23  | 17.60        | 0.40 | 0.74              | 13.00   | 1.60       | 8.90                    | 1.20                                | 0.50             | 0.20      |
| 24  | 17.85        | 0.30 | 0.67              | 13.00   | 1.80       | 8.70                    | 1.10                                | 0.40             | 0.18      |
| 25  | 18.57        | 0.30 | 0.86              | 14.00   | 1.80       | 9.90                    | 1.20                                | 0.50             | 0.21      |
| 26  | 18.63        | 0.20 | 0.76              | 14.00   | 2.20       | 9.90                    | 1.00                                | 0.40             | 0.23      |
| 27  | 17.96        | 0.20 | 0.85              | 14.00   | 1.90       | 9.90                    | 1.30                                | 0.20             | 0.21      |
| 28  | 17.80        | 0.20 | 0.68              | 15.00   | 2.00       | 9.30                    | 1.20                                | 0.30             | 0.27      |
| 29  | 18.02        | 0.10 | 0.57              | 15.00   | 1.80       | 9.00                    | 1.30                                | 0.30             | 0.41      |
| 30  | 17.95        | 0.00 | 0.67              | 16.00   | 1.30       | 9.00                    | 1.10                                | 0.40             | 0.14      |

ADHD: Attention deficit hyperactivity disorder.

Table SM 5 - Incidence rates (cases/1000 person-years) by type of mental disorder per year for males.

| Age | Any disorder | ADHD | Conduct disorders | Anxiety | Depression | Substance use disorders | Psychosis and personality disorders | Eating disorders | Self-harm |
|-----|--------------|------|-------------------|---------|------------|-------------------------|-------------------------------------|------------------|-----------|
| 1   | 0.49         | 0.03 | 0.30              | 0.02    | 0.06       | 0.00                    | 0.04                                | 0.03             | 0.00      |
| 2   | 2.78         | 0.14 | 1.28              | 0.29    | 0.45       | 0.00                    | 0.10                                | 0.57             | 0.01      |
| 3   | 4.74         | 0.29 | 2.47              | 0.41    | 0.99       | 0.00                    | 0.27                                | 0.56             | 0.00      |
| 4   | 5.78         | 0.65 | 3.52              | 0.46    | 0.76       | 0.00                    | 0.24                                | 0.41             | 0.01      |
| 5   | 6.75         | 1.18 | 4.11              | 0.66    | 0.64       | 0.00                    | 0.28                                | 0.29             | 0.00      |
| 6   | 7.89         | 2.32 | 4.29              | 0.88    | 0.44       | 0.00                    | 0.24                                | 0.27             | 0.01      |
| 7   | 12.70        | 5.39 | 5.86              | 1.27    | 0.58       | 0.00                    | 0.24                                | 0.29             | 0.00      |
| 8   | 12.70        | 6.06 | 5.52              | 1.50    | 0.40       | 0.00                    | 0.29                                | 0.20             | 0.01      |
| 9   | 13.83        | 6.55 | 5.97              | 1.88    | 0.53       | 0.02                    | 0.24                                | 0.26             | 0.00      |
| 10  | 12.63        | 5.65 | 5.42              | 2.46    | 0.44       | 0.01                    | 0.25                                | 0.21             | 0.00      |
| 11  | 12.59        | 5.20 | 5.43              | 2.97    | 0.46       | 0.02                    | 0.28                                | 0.20             | 0.01      |
| 12  | 10.67        | 4.06 | 4.72              | 2.90    | 0.46       | 0.04                    | 0.29                                | 0.18             | 0.02      |
| 13  | 11.31        | 4.54 | 4.85              | 3.20    | 0.48       | 0.17                    | 0.36                                | 0.23             | 0.03      |
| 14  | 11.91        | 5.12 | 4.98              | 2.90    | 0.52       | 0.64                    | 0.52                                | 0.29             | 0.09      |
| 15  | 10.60        | 3.59 | 3.20              | 3.70    | 0.61       | 1.97                    | 0.63                                | 0.27             | 0.07      |
| 16  | 10.00        | 2.24 | 2.47              | 3.90    | 0.69       | 3.72                    | 0.73                                | 0.37             | 0.08      |
| 17  | 11.25        | 1.68 | 2.22              | 5.00    | 0.88       | 5.21                    | 1.01                                | 0.39             | 0.09      |
| 18  | 12.04        | 1.37 | 1.89              | 6.00    | 1.22       | 6.40                    | 1.15                                | 0.27             | 0.08      |
| 19  | 12.84        | 0.84 | 1.29              | 7.00    | 1.20       | 7.50                    | 1.48                                | 0.19             | 0.12      |
| 20  | 13.73        | 0.59 | 1.05              | 7.70    | 1.40       | 8.60                    | 1.57                                | 0.14             | 0.16      |
| 21  | 15.07        | 0.41 | 1.13              | 9.10    | 1.80       | 8.90                    | 1.60                                | 0.20             | 0.11      |
| 22  | 15.50        | 0.34 | 0.93              | 9.40    | 1.70       | 9.80                    | 1.40                                | 0.19             | 0.22      |
| 23  | 15.37        | 0.47 | 0.75              | 9.30    | 1.60       | 10.20                   | 1.60                                | 0.19             | 0.19      |
| 24  | 15.65        | 0.37 | 0.69              | 10.20   | 1.70       | 9.70                    | 1.50                                | 0.11             | 0.14      |
| 25  | 16.73        | 0.34 | 0.98              | 10.90   | 1.80       | 11.00                   | 1.40                                | 0.18             | 0.18      |
| 26  | 16.54        | 0.26 | 0.81              | 11.00   | 2.30       | 11.00                   | 1.50                                | 0.15             | 0.27      |
| 27  | 16.01        | 0.34 | 0.90              | 11.00   | 2.20       | 11.10                   | 1.80                                | 0.04             | 0.17      |
| 28  | 16.49        | 0.32 | 0.75              | 12.00   | 1.70       | 11.00                   | 1.60                                | 0.05             | 0.24      |
| 29  | 15.16        | 0.14 | 0.59              | 11.00   | 1.50       | 10.00                   | 1.70                                | 0.04             | 0.30      |
| 30  | 15.87        | 0.10 | 0.76              | 13.00   | 0.90       | 10.00                   | 1.20                                | 0.07             | 0.12      |

ADHD: Attention deficit hyperactivity disorder.

Table SM 6 - Incidence rates (cases/1000 person-years) by type of mental disorder per year for females.

| Age | Any disorder | ADHD | Conduct disorders | Anxiety | Depression | Substance use disorders | Psychosis and personality disorders | Eating disorders | Self-harm |
|-----|--------------|------|-------------------|---------|------------|-------------------------|-------------------------------------|------------------|-----------|
| 1   | 0.56         | 0.03 | 0.38              | 0.01    | 0.04       | 0.00                    | 0.03                                | 0.06             | 0.00      |
| 2   | 2.02         | 0.08 | 0.81              | 0.23    | 0.19       | 0.00                    | 0.12                                | 0.61             | 0.01      |
| 3   | 2.70         | 0.09 | 1.68              | 0.31    | 0.21       | 0.00                    | 0.10                                | 0.39             | 0.00      |
| 4   | 3.04         | 0.21 | 1.96              | 0.37    | 0.17       | 0.00                    | 0.09                                | 0.34             | 0.01      |
| 5   | 3.71         | 0.29 | 2.36              | 0.54    | 0.18       | 0.00                    | 0.09                                | 0.35             | 0.01      |
| 6   | 3.89         | 0.62 | 2.30              | 0.59    | 0.15       | 0.00                    | 0.08                                | 0.30             | 0.00      |
| 7   | 6.26         | 1.89 | 3.08              | 1.15    | 0.17       | 0.00                    | 0.11                                | 0.25             | 0.00      |
| 8   | 6.86         | 2.33 | 3.09              | 1.41    | 0.10       | 0.00                    | 0.11                                | 0.25             | 0.00      |
| 9   | 8.19         | 2.66 | 3.61              | 1.93    | 0.12       | 0.01                    | 0.13                                | 0.25             | 0.00      |
| 10  | 8.20         | 2.41 | 3.33              | 2.63    | 0.15       | 0.00                    | 0.18                                | 0.25             | 0.00      |
| 11  | 7.97         | 1.90 | 3.35              | 3.04    | 0.18       | 0.03                    | 0.15                                | 0.27             | 0.00      |
| 12  | 6.94         | 1.40 | 2.56              | 3.00    | 0.18       | 0.06                    | 0.16                                | 0.41             | 0.03      |
| 13  | 8.01         | 1.50 | 3.34              | 3.40    | 0.20       | 0.14                    | 0.21                                | 0.61             | 0.07      |
| 14  | 10.63        | 1.70 | 3.83              | 4.40    | 0.44       | 0.68                    | 0.43                                | 1.26             | 0.20      |
| 15  | 11.51        | 1.10 | 2.15              | 6.10    | 0.76       | 2.16                    | 0.45                                | 1.82             | 0.19      |
| 16  | 13.49        | 0.90 | 1.96              | 8.20    | 0.89       | 3.03                    | 0.84                                | 2.01             | 0.29      |
| 17  | 16.14        | 0.70 | 1.63              | 10.80   | 1.21       | 3.97                    | 0.84                                | 2.27             | 0.27      |
| 18  | 18.30        | 0.60 | 1.56              | 13.20   | 1.32       | 4.80                    | 1.05                                | 1.80             | 0.39      |
| 19  | 18.24        | 0.50 | 1.10              | 13.80   | 1.31       | 5.50                    | 0.77                                | 1.50             | 0.19      |
| 20  | 18.35        | 0.30 | 1.14              | 14.40   | 1.24       | 5.90                    | 0.69                                | 1.20             | 0.23      |
| 21  | 19.45        | 0.30 | 0.84              | 15.50   | 1.38       | 6.60                    | 0.92                                | 1.10             | 0.15      |
| 22  | 20.04        | 0.20 | 0.60              | 16.00   | 1.50       | 6.70                    | 0.80                                | 1.10             | 0.21      |
| 23  | 19.93        | 0.20 | 0.73              | 17.00   | 1.60       | 7.60                    | 0.84                                | 0.90             | 0.22      |
| 24  | 20.15        | 0.30 | 0.64              | 16.00   | 2.00       | 7.80                    | 0.73                                | 0.70             | 0.21      |
| 25  | 20.49        | 0.20 | 0.74              | 17.00   | 1.80       | 8.60                    | 0.87                                | 0.80             | 0.26      |
| 26  | 20.81        | 0.20 | 0.70              | 17.00   | 2.10       | 8.90                    | 0.40                                | 0.50             | 0.18      |
| 27  | 19.97        | 0.10 | 0.81              | 17.00   | 1.70       | 8.60                    | 0.80                                | 0.50             | 0.25      |
| 28  | 19.15        | 0.00 | 0.62              | 17.00   | 2.20       | 8.00                    | 0.90                                | 0.50             | 0.29      |
| 29  | 20.94        | 0.00 | 0.56              | 19.00   | 2.10       | 8.00                    | 0.90                                | 0.60             | 0.53      |
| 30  | 20.05        | 0.10 | 0.57              | 19.00   | 1.70       | 7.90                    | 0.90                                | 0.70             | 0.16      |

ADHD: Attention deficit hyperactivity disorder.

Table SM 7 - Incidence rates (cases/1000 person-years) by type of mental disorder per year for low socioeconomic status.

| Age | Any disorder | ADHD | Conduct disorders | Anxiety | Depression | Substance use disorders | Psychosis and personality disorders | Eating disorders | Self-harm |
|-----|--------------|------|-------------------|---------|------------|-------------------------|-------------------------------------|------------------|-----------|
| 1   | 0.81         | 0.00 | 0.54              | 0.00    | 0.09       | 0.00                    | 0.18                                | 0.00             | 0.00      |
| 2   | 3.58         | 0.05 | 1.33              | 0.14    | 0.88       | 0.00                    | 0.27                                | 0.92             | 0.05      |
| 3   | 6.23         | 0.19 | 3.31              | 0.58    | 1.20       | 0.00                    | 0.62                                | 0.72             | 0.00      |
| 4   | 8.02         | 0.71 | 5.45              | 0.65    | 1.00       | 0.00                    | 0.26                                | 0.46             | 0.05      |
| 5   | 8.30         | 1.34 | 4.68              | 0.75    | 0.75       | 0.00                    | 0.48                                | 0.75             | 0.00      |
| 6   | 9.40         | 2.09 | 6.31              | 0.34    | 0.78       | 0.00                    | 0.28                                | 0.23             | 0.00      |
| 7   | 15.80        | 4.78 | 7.80              | 2.02    | 1.30       | 0.00                    | 0.54                                | 0.47             | 0.00      |
| 8   | 13.94        | 4.55 | 7.71              | 2.03    | 0.57       | 0.00                    | 0.38                                | 0.32             | 0.00      |
| 9   | 15.98        | 5.20 | 8.52              | 2.31    | 0.61       | 0.00                    | 0.27                                | 0.69             | 0.00      |
| 10  | 13.40        | 3.70 | 7.70              | 2.72    | 0.72       | 0.07                    | 0.58                                | 0.15             | 0.00      |
| 11  | 15.59        | 2.90 | 8.95              | 4.95    | 0.63       | 0.08                    | 0.32                                | 0.56             | 0.00      |
| 12  | 12.70        | 2.90 | 6.73              | 3.96    | 1.04       | 0.52                    | 0.77                                | 0.52             | 0.09      |
| 13  | 13.85        | 2.20 | 7.59              | 6.17    | 0.73       | 0.86                    | 0.84                                | 0.75             | 0.19      |
| 14  | 18.61        | 2.60 | 9.56              | 6.68    | 1.20       | 2.45                    | 1.21                                | 2.04             | 0.31      |
| 15  | 20.69        | 2.40 | 6.29              | 8.90    | 2.70       | 6.42                    | 2.87                                | 1.00             | 0.55      |
| 16  | 24.38        | 1.40 | 5.45              | 15.22   | 3.30       | 8.10                    | 3.34                                | 1.20             | 0.48      |
| 17  | 24.97        | 1.20 | 5.59              | 16.46   | 3.00       | 11.40                   | 4.31                                | 1.70             | 0.39      |
| 18  | 26.60        | 0.50 | 4.69              | 18.22   | 3.90       | 14.80                   | 5.01                                | 1.28             | 0.44      |
| 19  | 31.39        | 0.80 | 2.82              | 22.11   | 5.30       | 16.90                   | 7.24                                | 0.46             | 0.48      |
| 20  | 25.95        | 1.00 | 3.55              | 20.91   | 6.00       | 15.20                   | 5.28                                | 0.85             | 1.36      |
| 21  | 29.48        | 0.70 | 4.05              | 22.18   | 4.70       | 17.40                   | 5.88                                | 0.55             | 0.19      |
| 22  | 33.38        | 0.20 | 2.83              | 28.00   | 6.40       | 17.80                   | 6.05                                | 0.81             | 1.20      |
| 23  | 30.81        | 0.50 | 2.27              | 24.48   | 5.10       | 19.00                   | 4.38                                | 1.09             | 1.76      |
| 24  | 26.74        | 0.70 | 4.65              | 25.47   | 7.10       | 19.00                   | 7.40                                | 0.48             | 1.22      |
| 25  | 31.82        | 0.50 | 4.12              | 29.50   | 6.10       | 18.00                   | 6.67                                | 1.34             | 1.65      |
| 26  | 26.49        | 0.90 | 1.75              | 23.68   | 7.70       | 21.00                   | 4.10                                | 0.32             | 1.20      |
| 27  | 20.36        | 1.10 | 3.31              | 19.65   | 5.00       | 17.00                   | 6.97                                | 0.00             | 1.20      |
| 28  | 27.81        | 0.40 | 3.74              | 25.27   | 3.60       | 19.00                   | 7.76                                | 0.42             | 1.90      |
| 29  | 23.95        | 0.00 | 3.43              | 24.03   | 4.60       | 17.00                   | 1.91                                | 1.10             | 2.90      |
| 30  | 18.91        | 0.00 | 0.71              | 18.60   | 1.60       | 15.00                   | 2.05                                | 1.08             | 1.50      |

ADHD: Attention deficit hyperactivity disorder.

Table SM 8 - Incidence rates (cases/1000 person-years) by type of mental disorder per year for medium socioeconomic status.

| Age | Any disorder | ADHD | Conduct disorders | Anxiety | Depression | Substance use disorders | Psychosis and personality disorders | Eating disorders | Self-harm |
|-----|--------------|------|-------------------|---------|------------|-------------------------|-------------------------------------|------------------|-----------|
| 1   | 0.43         | 0.04 | 0.27              | 0.00    | 0.05       | 0.00                    | 0.03                                | 0.04             | 0.00      |
| 2   | 1.99         | 0.10 | 0.87              | 0.23    | 0.25       | 0.00                    | 0.09                                | 0.47             | 0.00      |
| 3   | 3.33         | 0.21 | 1.85              | 0.28    | 0.55       | 0.00                    | 0.17                                | 0.41             | 0.00      |
| 4   | 4.00         | 0.48 | 2.40              | 0.39    | 0.43       | 0.00                    | 0.15                                | 0.34             | 0.00      |
| 5   | 4.65         | 0.67 | 2.92              | 0.53    | 0.32       | 0.00                    | 0.14                                | 0.29             | 0.01      |
| 6   | 5.44         | 1.30 | 3.07              | 0.66    | 0.28       | 0.00                    | 0.16                                | 0.25             | 0.01      |
| 7   | 8.56         | 3.19 | 4.23              | 1.05    | 0.33       | 0.00                    | 0.16                                | 0.23             | 0.00      |
| 8   | 9.09         | 3.82 | 4.07              | 1.39    | 0.24       | 0.00                    | 0.17                                | 0.20             | 0.00      |
| 9   | 10.18        | 4.08 | 4.61              | 1.74    | 0.29       | 0.02                    | 0.19                                | 0.22             | 0.00      |
| 10  | 9.81         | 3.60 | 4.25              | 2.35    | 0.28       | 0.01                    | 0.24                                | 0.25             | 0.00      |
| 11  | 9.95         | 3.50 | 4.28              | 2.78    | 0.26       | 0.02                    | 0.21                                | 0.21             | 0.00      |
| 12  | 8.79         | 2.60 | 3.80              | 2.86    | 0.29       | 0.06                    | 0.18                                | 0.26             | 0.03      |
| 13  | 9.89         | 3.00 | 4.34              | 3.27    | 0.34       | 0.15                    | 0.27                                | 0.40             | 0.06      |
| 14  | 11.34        | 3.40 | 4.55              | 3.65    | 0.48       | 0.68                    | 0.47                                | 0.73             | 0.15      |
| 15  | 11.27        | 2.50 | 2.78              | 4.92    | 0.65       | 2.03                    | 0.52                                | 1.00             | 0.11      |
| 16  | 11.86        | 1.60 | 2.46              | 6.09    | 0.74       | 3.35                    | 0.81                                | 1.07             | 0.18      |
| 17  | 13.69        | 1.20 | 1.96              | 7.85    | 0.97       | 4.68                    | 0.89                                | 1.21             | 0.15      |
| 18  | 15.41        | 1.00 | 1.75              | 9.65    | 1.21       | 5.80                    | 1.11                                | 1.07             | 0.22      |
| 19  | 15.97        | 0.70 | 1.29              | 10.60   | 1.17       | 6.80                    | 1.08                                | 0.86             | 0.16      |
| 20  | 16.50        | 0.40 | 1.15              | 11.20   | 1.27       | 7.50                    | 1.06                                | 0.70             | 0.18      |
| 21  | 17.72        | 0.30 | 0.99              | 12.39   | 1.60       | 8.10                    | 1.29                                | 0.60             | 0.15      |
| 22  | 18.19        | 0.30 | 0.74              | 13.11   | 1.60       | 8.50                    | 1.12                                | 0.70             | 0.24      |
| 23  | 18.18        | 0.30 | 0.77              | 13.04   | 1.70       | 9.40                    | 1.30                                | 0.60             | 0.21      |
| 24  | 18.60        | 0.40 | 0.65              | 13.72   | 1.90       | 8.90                    | 1.10                                | 0.40             | 0.15      |
| 25  | 18.97        | 0.30 | 0.82              | 14.11   | 1.90       | 10.10                   | 1.20                                | 0.50             | 0.21      |
| 26  | 18.96        | 0.20 | 0.80              | 14.47   | 2.20       | 10.20                   | 1.00                                | 0.30             | 0.25      |
| 27  | 18.81        | 0.20 | 0.84              | 14.50   | 2.10       | 10.40                   | 1.40                                | 0.30             | 0.21      |
| 28  | 18.40        | 0.20 | 0.71              | 15.42   | 2.20       | 10.30                   | 1.20                                | 0.30             | 0.29      |
| 29  | 18.64        | 0.10 | 0.63              | 15.25   | 2.00       | 9.00                    | 1.70                                | 0.20             | 0.46      |
| 30  | 18.95        | 0.10 | 0.81              | 16.73   | 1.40       | 10.00                   | 1.20                                | 0.40             | 0.14      |

ADHD: Attention deficit hyperactivity disorder.



Table SM 9 - Incidence rates (cases/1000 person-years) by type of mental disorder per year for high socioeconomic status.

| Age | Any disorder | ADHD | Conduct disorders | Anxiety | Depression | Substance use disorders | Psychosis and personality disorders | Eating disorders | Self-harm |
|-----|--------------|------|-------------------|---------|------------|-------------------------|-------------------------------------|------------------|-----------|
| 1   | 0.62         | 0.02 | 0.42              | 0.04    | 0.05       | 0.00                    | 0.03                                | 0.05             | 0.01      |
| 2   | 2.85         | 0.11 | 1.25              | 0.31    | 0.37       | 0.00                    | 0.13                                | 0.72             | 0.01      |
| 3   | 4.08         | 0.16 | 2.29              | 0.45    | 0.63       | 0.00                    | 0.17                                | 0.55             | 0.01      |
| 4   | 4.74         | 0.36 | 3.01              | 0.43    | 0.49       | 0.00                    | 0.19                                | 0.42             | 0.01      |
| 5   | 5.84         | 0.79 | 3.60              | 0.68    | 0.50       | 0.00                    | 0.23                                | 0.32             | 0.00      |
| 6   | 6.35         | 1.69 | 3.42              | 0.88    | 0.29       | 0.00                    | 0.15                                | 0.34             | 0.01      |
| 7   | 10.47        | 4.31 | 4.62              | 1.38    | 0.37       | 0.00                    | 0.17                                | 0.31             | 0.00      |
| 8   | 10.62        | 4.85 | 4.45              | 1.50    | 0.27       | 0.00                    | 0.24                                | 0.24             | 0.02      |
| 9   | 12.04        | 5.40 | 4.84              | 2.13    | 0.36       | 0.01                    | 0.16                                | 0.27             | 0.00      |
| 10  | 11.29        | 4.80 | 4.37              | 2.83    | 0.30       | 0.00                    | 0.16                                | 0.20             | 0.00      |
| 11  | 10.55        | 3.90 | 4.27              | 3.23    | 0.38       | 0.03                    | 0.22                                | 0.24             | 0.01      |
| 12  | 8.67         | 3.00 | 3.22              | 2.95    | 0.35       | 0.00                    | 0.25                                | 0.34             | 0.02      |
| 13  | 9.07         | 3.10 | 3.44              | 3.17    | 0.30       | 0.11                    | 0.27                                | 0.42             | 0.02      |
| 14  | 10.62        | 3.70 | 3.74              | 3.42    | 0.43       | 0.48                    | 0.44                                | 0.72             | 0.12      |
| 15  | 9.76         | 2.10 | 2.19              | 4.27    | 0.59       | 1.79                    | 0.39                                | 1.10             | 0.12      |
| 16  | 10.24        | 1.60 | 1.43              | 5.10    | 0.66       | 3.02                    | 0.49                                | 1.38             | 0.16      |
| 17  | 12.49        | 1.30 | 1.52              | 6.83    | 1.03       | 3.78                    | 0.70                                | 1.55             | 0.24      |
| 18  | 13.17        | 1.00 | 1.37              | 8.61    | 1.16       | 4.20                    | 0.70                                | 0.82             | 0.26      |
| 19  | 12.42        | 0.60 | 0.77              | 8.34    | 1.09       | 4.60                    | 0.67                                | 0.80             | 0.08      |
| 20  | 13.37        | 0.60 | 0.65              | 9.23    | 0.88       | 5.80                    | 0.83                                | 0.60             | 0.13      |
| 21  | 14.16        | 0.20 | 0.64              | 10.50   | 1.30       | 5.20                    | 0.69                                | 0.60             | 0.04      |
| 22  | 14.22        | 0.40 | 0.61              | 9.87    | 1.00       | 6.50                    | 0.63                                | 0.50             | 0.02      |
| 23  | 13.99        | 0.30 | 0.44              | 10.76   | 0.70       | 6.00                    | 0.44                                | 0.40             | 0.00      |
| 24  | 14.17        | 0.20 | 0.21              | 10.09   | 1.30       | 6.80                    | 0.30                                | 0.30             | 0.13      |
| 25  | 15.66        | 0.20 | 0.59              | 10.82   | 0.90       | 7.60                    | 0.34                                | 0.40             | 0.07      |
| 26  | 16.72        | 0.10 | 0.48              | 12.34   | 1.30       | 7.70                    | 0.35                                | 0.40             | 0.04      |
| 27  | 15.23        | 0.10 | 0.58              | 11.59   | 1.30       | 7.70                    | 0.38                                | 0.20             | 0.08      |
| 28  | 15.02        | 0.00 | 0.24              | 11.91   | 1.00       | 6.50                    | 0.38                                | 0.30             | 0.00      |
| 29  | 15.72        | 0.10 | 0.07              | 13.24   | 1.00       | 6.50                    | 0.50                                | 0.40             | 0.00      |
| 30  | 15.34        | 0.20 | 0.29              | 13.46   | 1.00       | 6.90                    | 0.40                                | 0.30             | 0.00      |

ADHD: Attention deficit hyperactivity disorder.

Table SM10 - Incidence rate ratios of mental disorder as a function of age, gender and socioeconomic status (Poisson regressions of incidence rates without gender # SES interaction).

|                | <b>Any disorder</b> | <b>ADHD</b>       | <b>Conduct disorders</b> | <b>Anxiety</b>    | <b>Depression</b> | <b>Substance abuse</b> | <b>Psychosis and personality disorders</b> | <b>Eating disorders</b> | <b>Self-harm</b>  |
|----------------|---------------------|-------------------|--------------------------|-------------------|-------------------|------------------------|--------------------------------------------|-------------------------|-------------------|
| Age IRR        | 1.09                | 1.00              | 0.99                     | 1.16              | 1.10              | 1.23                   | 1.12                                       | 1.05                    | 1.16              |
| CI (p)         | 1.09-1.09(<0.001)   | 1.00-1.01(<0.001) | 0.99-0.99(<0.001)        | 1.16-1.16(<0.001) | 1.09-1.10(<0.001) | 1.22-1.23(<0.001)      | 1.11-1.12(<0.001)                          | 1.04-1.05(<0.001)       | 1.15-1.17(<0.001) |
| Female IRR     | Reference           | Reference         | Reference                | Reference         | Reference         | Reference              | Reference                                  | Reference               | Reference         |
| Male IRR       | 1.14                | 2.74              | 1.62                     | 0.63              | 1.46              | 1.37                   | 1.75                                       | 0.41                    | 0.65              |
| CI (p)         | 1.13-1.16(<0.001)   | 2.65-2.84(<0.001) | 1.58-1.66(<0.001)        | 0.61-0.64(<0.001) | 1.39-1.54(<0.001) | 1.33-1.41(<0.001)      | 1.65-1.86(<0.001)                          | 0.39-0.44(<0.001)       | 0.56-0.76(<0.001) |
| SES high IRR   | Reference           | Reference         | Reference                | Reference         | Reference         | Reference              | Reference                                  | Reference               | Reference         |
| SES medium IRR | 1.00                | 0.81              | 0.95                     | 1.11              | 1.09              | 1.51                   | 1.38                                       | 0.87                    | 1.28              |
| CI (p)         | 0.98-1.01(0.521)    | 0.78-0.83(<0.001) | 0.93-0.98(<0.001)        | 1.08-1.14(<0.001) | 1.03-1.16(0,002)  | 1.45-1.56(<0.001)      | 1.28-1.48(<0.001)                          | 0.82-0.92(<0.001)       | 1.07-1.54(0,007)  |
| SES low IRR    | 1.84                | 0.99              | 2.04                     | 2.04              | 3.54              | 3.43                   | 5.92                                       | 1.33                    | 5.46              |
| CI (p)         | 1.79-1.90(<0.001)   | 0.91-1.08(0.774)  | 1.94-2.15(<0.001)        | 1.94-2.14(<0.001) | 3.22-3.90(<0.001) | 3.21-3.67(<0.001)      | 5.31-6.60(<0.001)                          | 1.16-1.54(<0.001)       | 4.20-7.09(<0.001) |

SES: socio economic status; IRR: incidence rate ratio; CI: 95% confidence intervals; ADHD: attention deficit hyperactivity disorder.

Figure SM 1 - Incidence (cases/1,000 person-year) of eating disorders and self-harm disaggregated by gender and socioeconomic status.

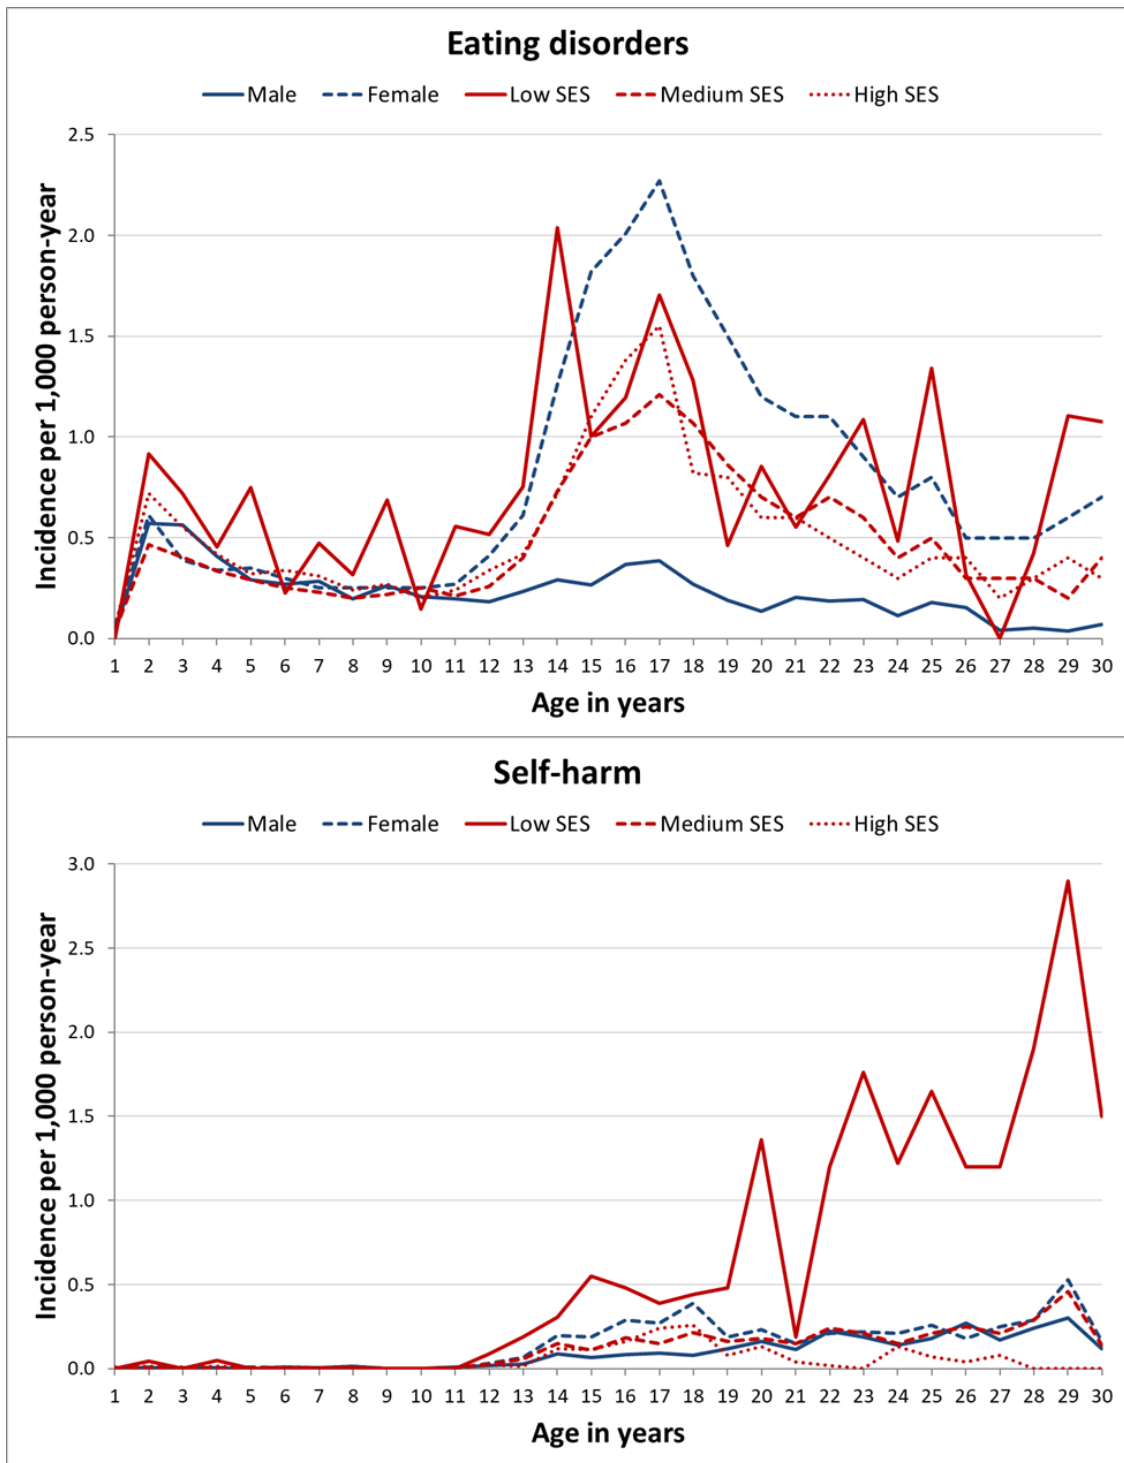

Figure SM2 - Cumulative incidence (%) of ADHD disaggregated by gender and socioeconomic status.

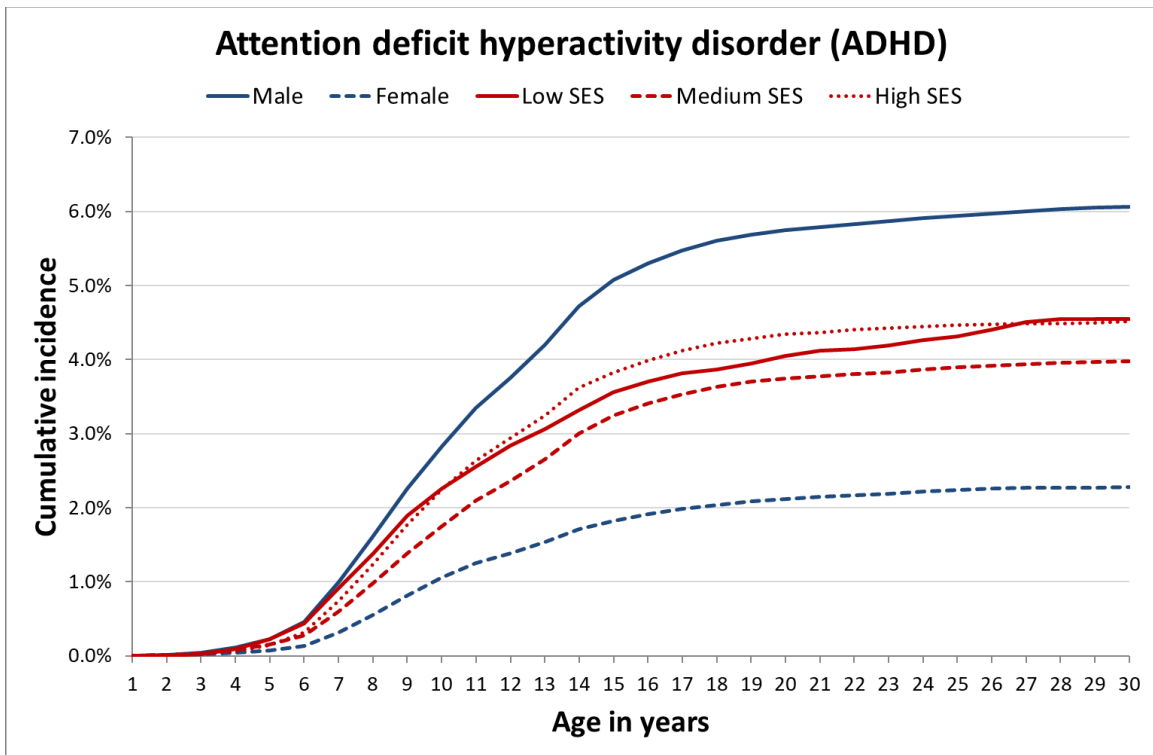

Figure SM3 - Cumulative incidence (%) of conduct disorders disaggregated by gender and socioeconomic status.

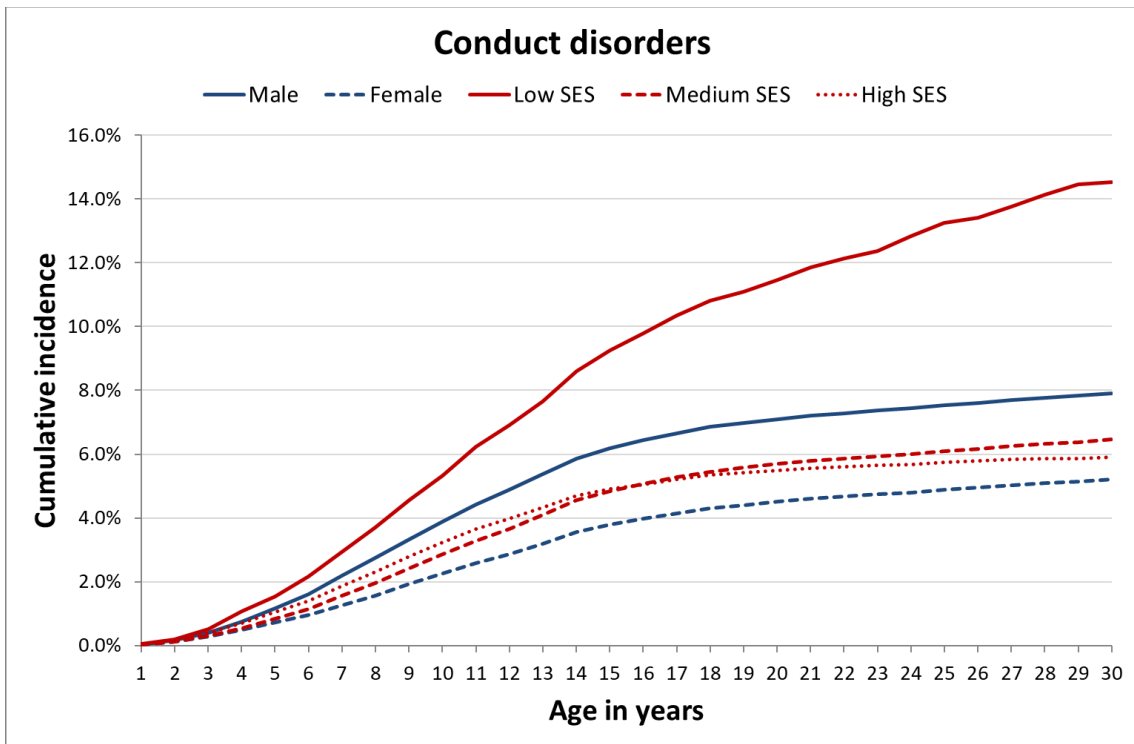

Figure SM4 - Cumulative incidence (%) of anxiety disaggregated by gender and socioeconomic status.

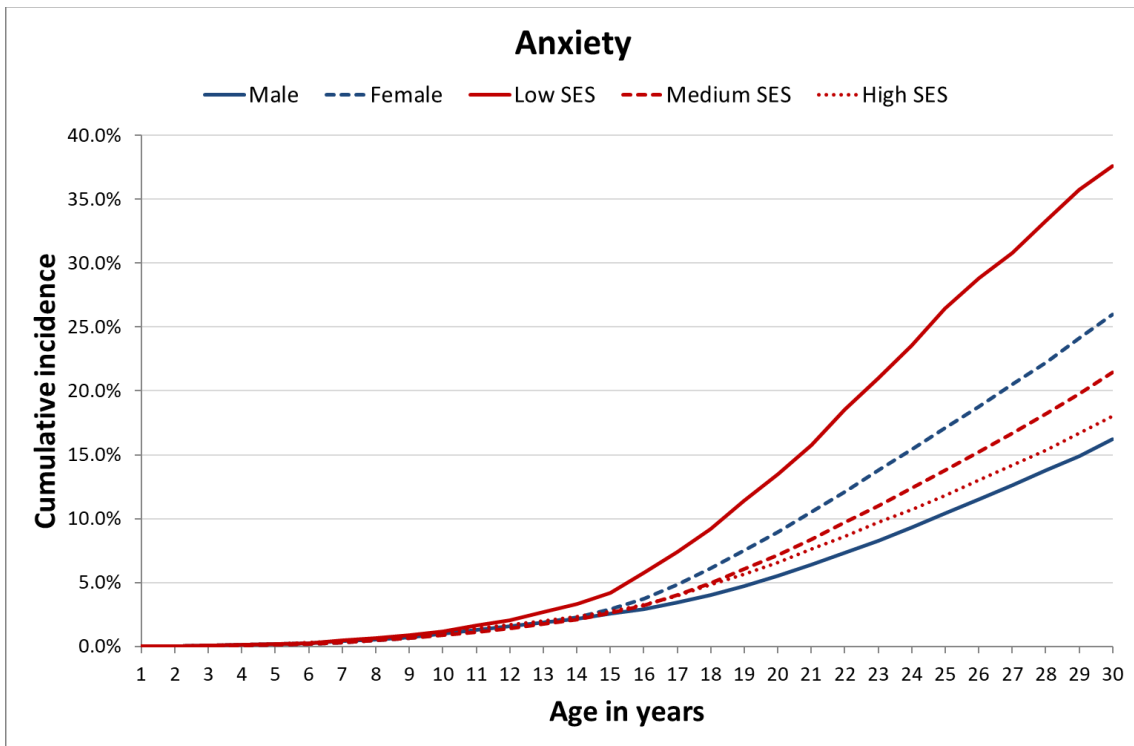

Figure SM5 - Cumulative incidence (%) of depression disaggregated by gender and socioeconomic status.

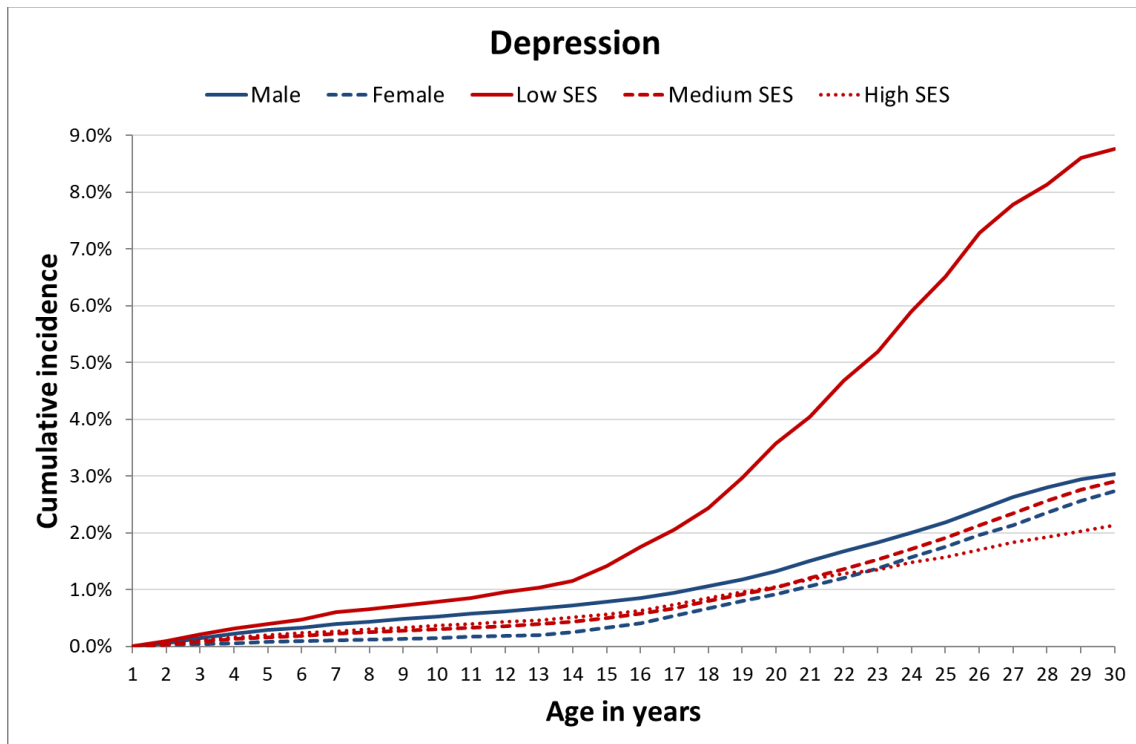

Figure SM6 - Cumulative incidence (%) of substance abuse disaggregated by gender and socioeconomic status.

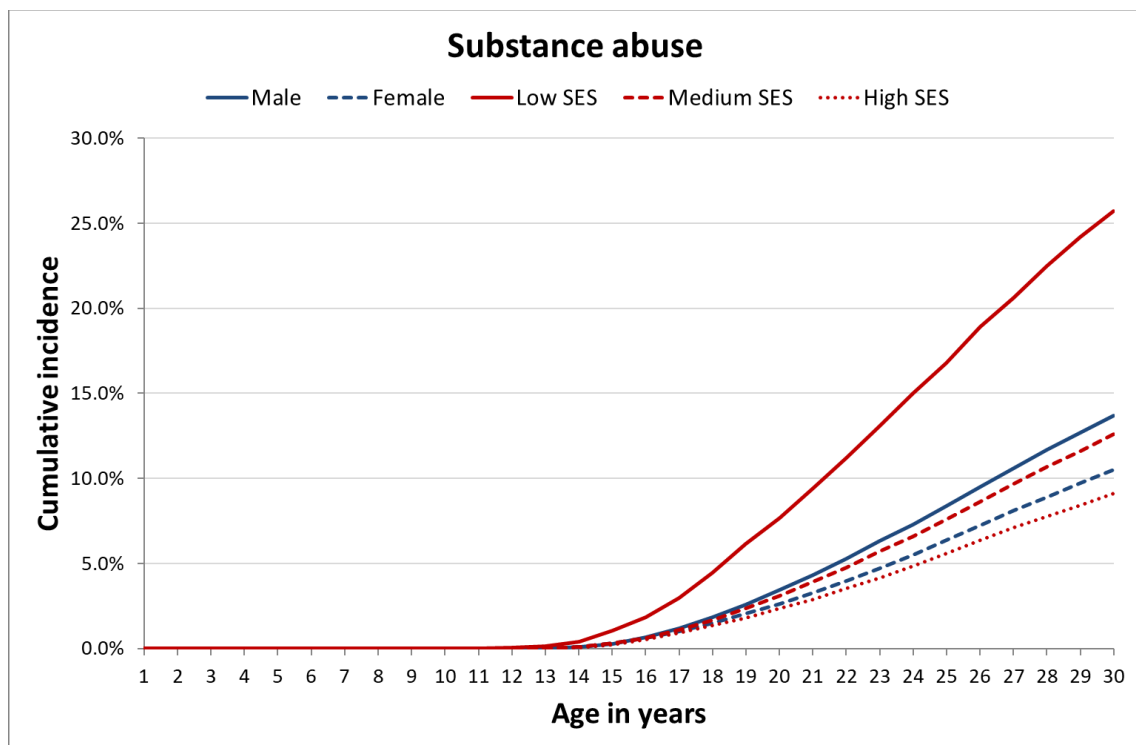



Figure SM7 - Cumulative incidence (%) of psychosis and personality disorders disaggregated by gender and socioeconomic status.

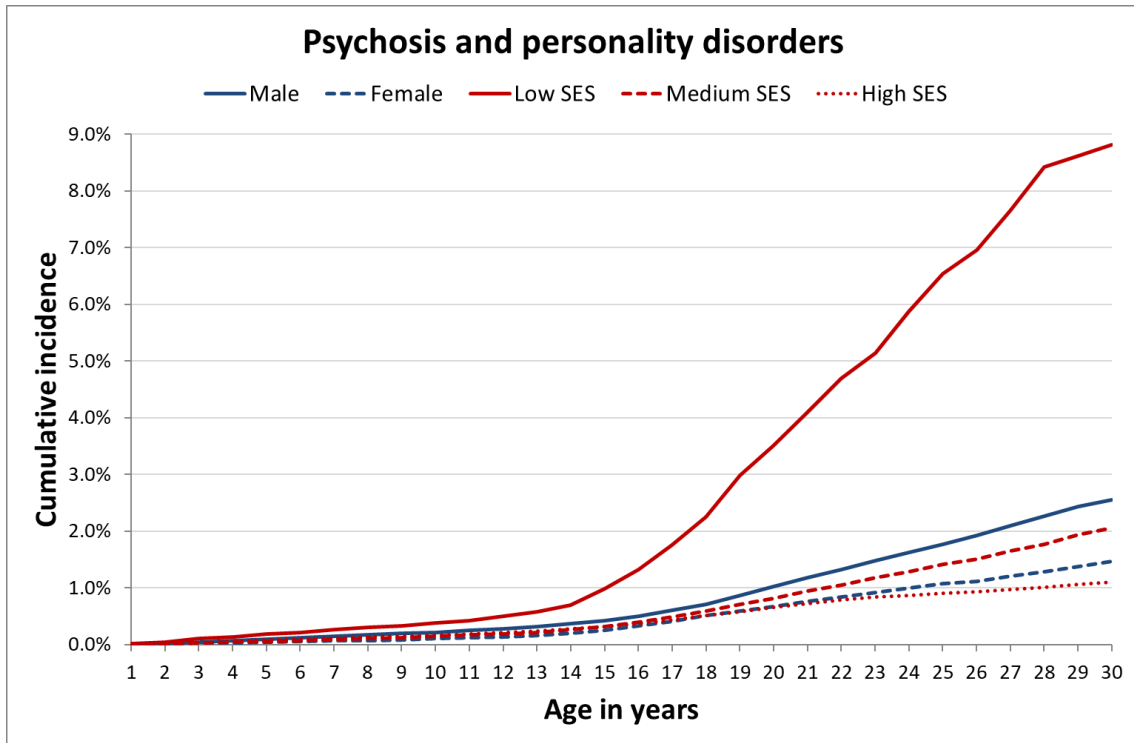

Figure SM8 - Cumulative incidence (%) of eating disorders disaggregated by gender and socioeconomic status.

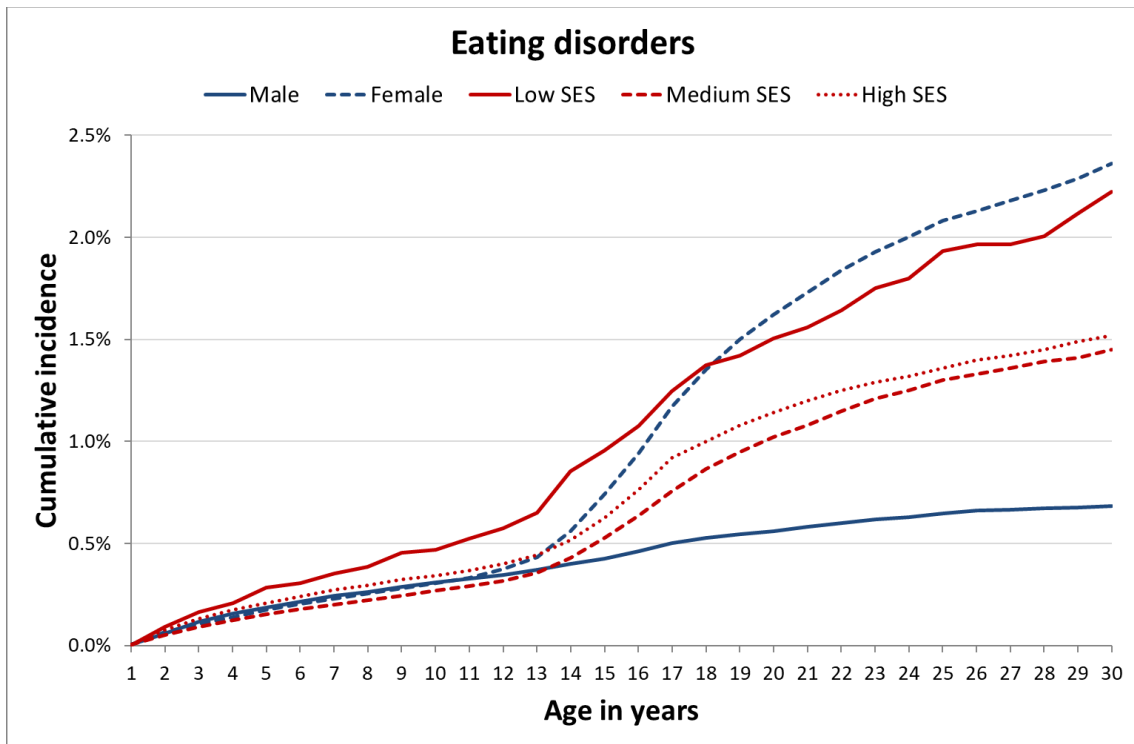

Figure SM9 - Cumulative incidence (%) of self-harm disaggregated by gender and socioeconomic status.

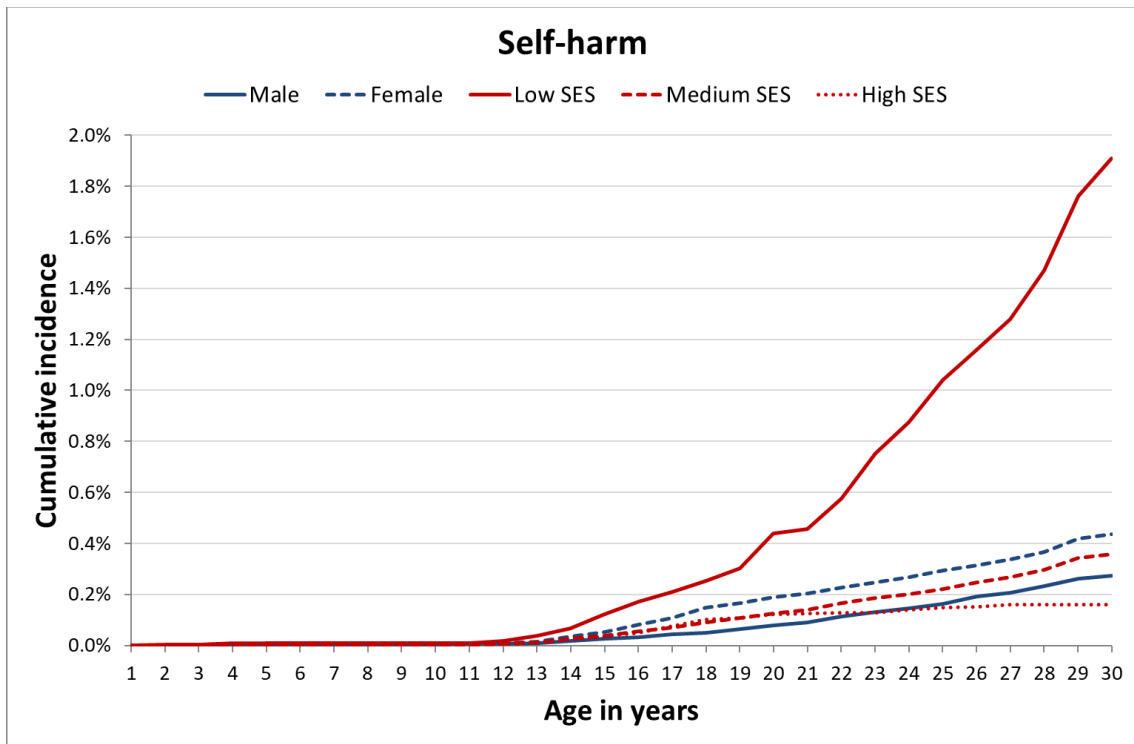

Figure SM10 - Comparison of the cumulative incidence (%) of mental disorders in Denmark and Basque country in females at the age of 18.

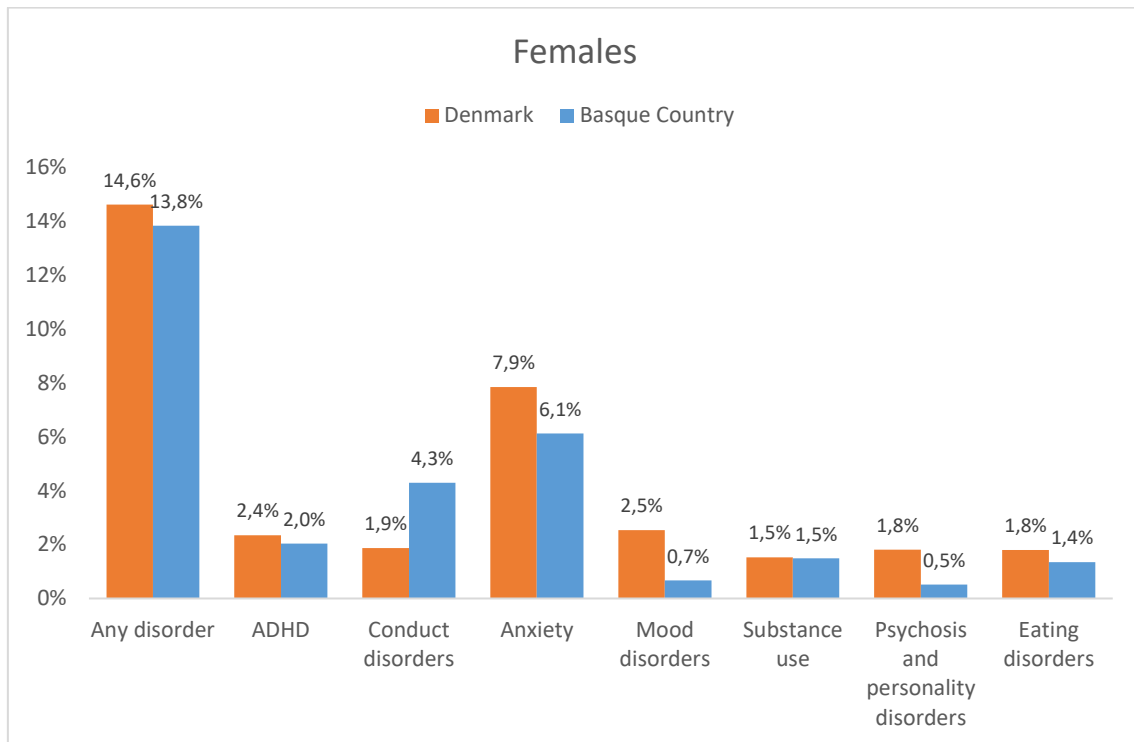

Figure SM11 - Comparison of the cumulative incidence (%) of mental disorders in Denmark and Basque country in males at the age of 18.

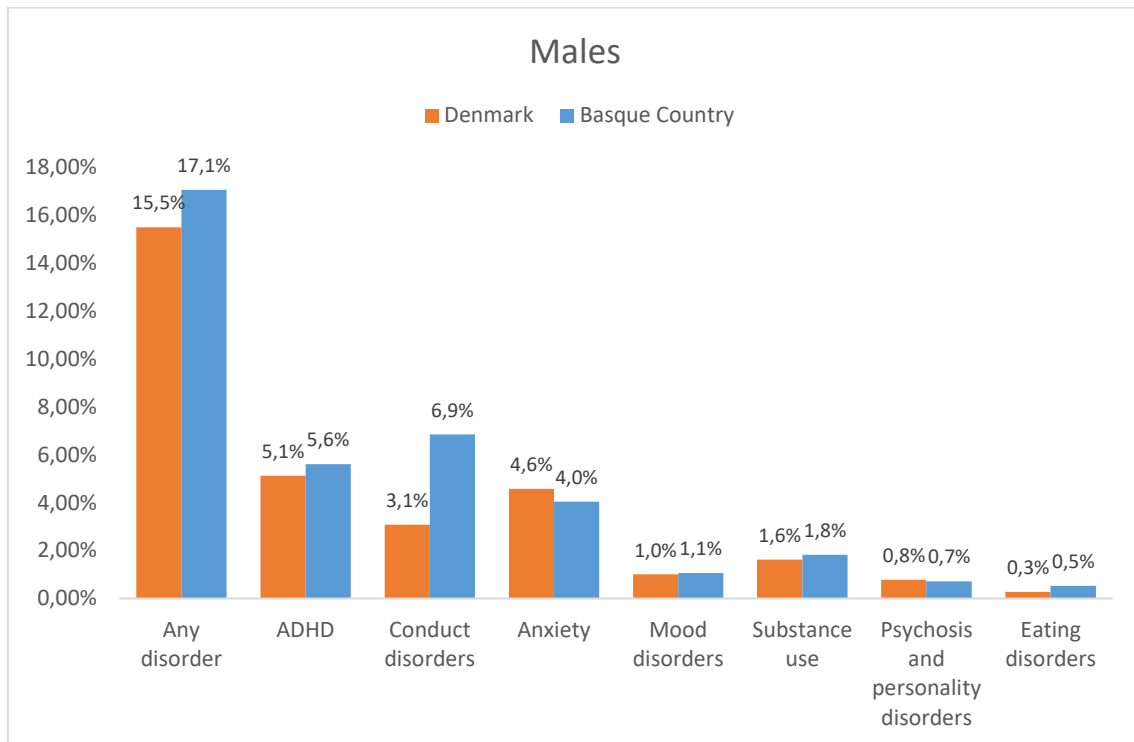

Supplement: 127_2023_2425_MOESM1_ESM.pdf [file 127_2023_2425_MOESM1_ESM.pdf]
